# Supplementary material
Source: PubMed Central journal article supplement (PMC2923870)
Supplement: jf1008023_si_004.pdf [file jf1008023_si_004.pdf]

# Preparation of Samples for Compositional Analysis

## Laboratory Analytical Procedure (LAP)

**Issue Date: 8/06/2008**

B. Hames, R. Ruiz, C. Scarlata, A. Sluiter,  
J. Sluiter, and D. Templeton

*Technical Report*  
**NREL/TP-510-42620**  
Revised August 2008

NREL is operated by Midwest Research Institute • Battelle Contract No. DE-AC36-99-GO10337

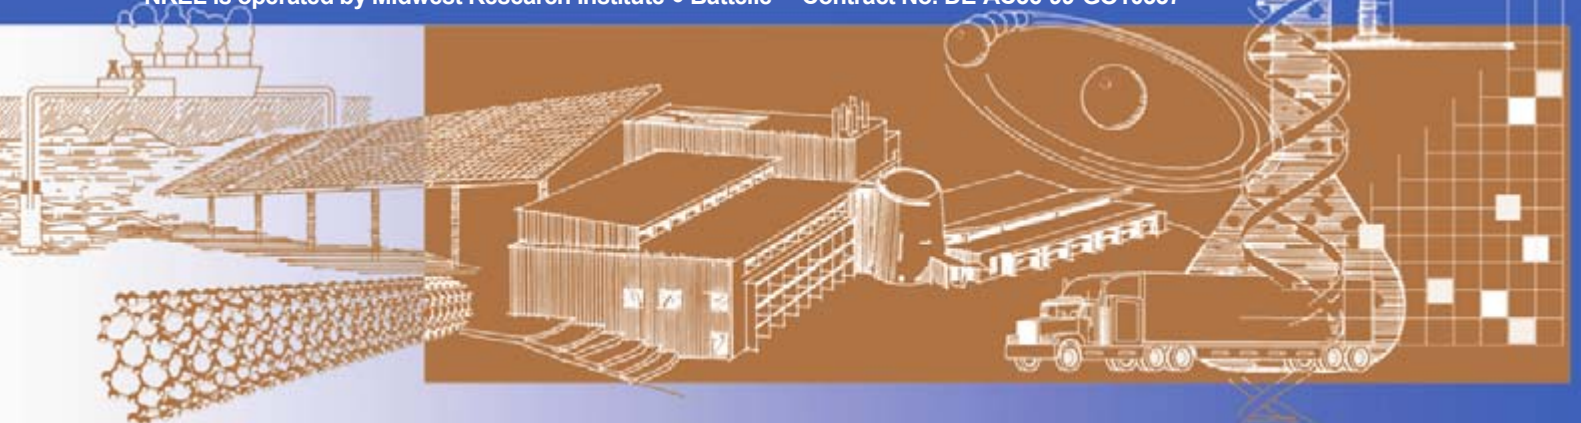

# Preparation of Samples for Compositional Analysis

## Laboratory Analytical Procedure (LAP)

Issue Date: 8/06/2008

B. Hames, R. Ruiz, C. Scarlata, A. Sluiter,  
J. Sluiter, and D. Templeton

*Technical Report*  
NREL/TP-510-42620  
Revised August 2008

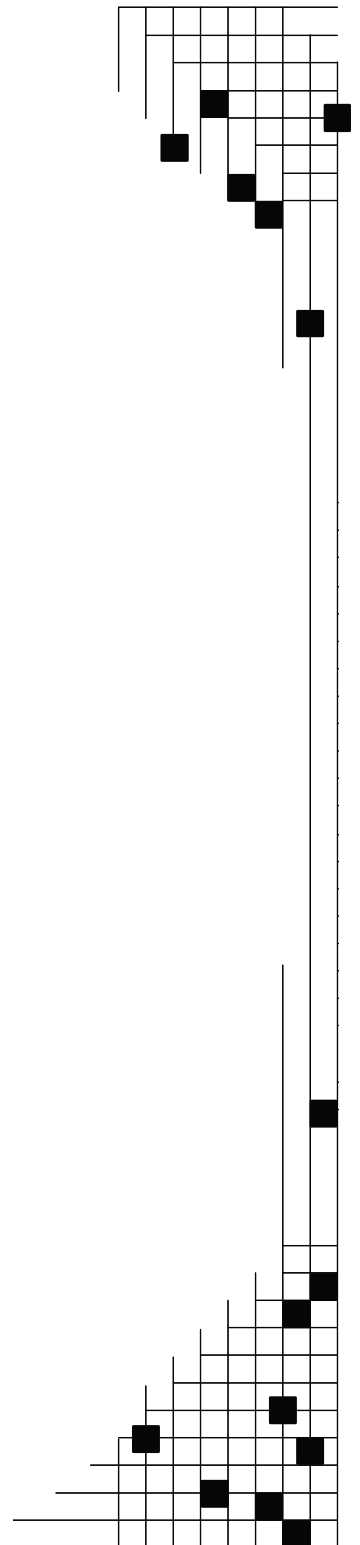

**National Renewable Energy Laboratory**  
1617 Cole Boulevard, Golden, Colorado 80401-3393  
303-275-3000 • [www.nrel.gov](http://www.nrel.gov)

Operated for the U.S. Department of Energy  
Office of Energy Efficiency and Renewable Energy  
by Midwest Research Institute • Battelle

Contract No. DE-AC36-99-GO10337

## DISCLAIMER

These Standard Biomass Analytical Methods (“Methods”) are provided by the National Renewable Energy Laboratory (“NREL”), which is operated by the Midwest Research Institute (“MRI”) for the Department Of Energy.

Access to and use of these Methods shall impose the following obligations on the user. The user is granted the right, without any fee or cost, to use, copy, modify, alter, enhance and distribute these Methods for any purpose whatsoever, except commercial sales, provided that this entire notice appears in all copies of the Methods. Further, the user agrees to credit NREL/MRI in any publications that result from the use of these Methods. The names NREL/MRI, however, may not be used in any advertising or publicity to endorse or promote any products or commercial entity unless specific written permission is obtained from NREL/MRI. The user also understands that NREL/MRI is not obligated to provide the user with any support, consulting, training or assistance of any kind with regard to the use of these Methods or to provide the user with any updates, revisions or new versions.

THESE METHODS ARE PROVIDED BY NREL/MRI "AS IS" AND ANY EXPRESS OR IMPLIED WARRANTIES, INCLUDING BUT NOT LIMITED TO, THE IMPLIED WARRANTIES OF MERCHANTABILITY AND FITNESS FOR A PARTICULAR PURPOSE ARE DISCLAIMED. IN NO EVENT SHALL NREL/MRI BE LIABLE FOR ANY SPECIAL, INDIRECT OR CONSEQUENTIAL DAMAGES OR ANY DAMAGES WHATSOEVER, INCLUDING BUT NOT LIMITED TO CLAIMS ASSOCIATED WITH THE LOSS OF DATA OR PROFITS, WHICH MAY RESULT FROM AN ACTION IN CONTRACT, NEGLIGENCE OR OTHER TORTIOUS CLAIM THAT ARISES OUT OF OR IN CONNECTION WITH THE ACCESS, USE OR PERFORMANCE OF THESE METHODS.

# Procedure Title: Preparation of Samples for Compositional Analysis

## Laboratory Analytical Procedure

### 1. Introduction

- 1.1 This procedure describes a reproducible way to convert a variety of biomass samples into a uniform material suitable for compositional analysis. The National Renewable Energy Laboratory (NREL) LAPs for compositional analysis have been optimized using samples with a specific particle size range and moisture content. All NREL biomass compositional analysis procedures assume that the samples have been prepared to meet these specifications. Deviations from these parameters may invalidate assumptions made in those methods and thereby introduce errors in the analysis. Procedures are listed that are suitable for the preparation of biomass feedstocks and a variety of biomass-derived materials. Representative sampling of biomass samples is also addressed.
- 1.2 This procedure is substantially similar to ASTM Standard Practice E 1757 – 01. Parts of this procedure are similar to TAPPI method number T264 and NFTA method A 1.1.
- 1.3 This procedure describes methods for drying, size reduction, obtaining samples with a uniform particle size and representative sampling of biomass samples.

### 2. Scope

- 2.1 This method is appropriate for the preparation of most types of biomass and biomass-derived solids for compositional analysis.
- 2.2 This procedure is not intended for materials that will already pass through a 20-mesh sieve.
- 2.3 This procedure is not intended for materials that cannot be dried by the described methods to a total solids content of greater than 90% of the sample's oven dried weight.
- 2.4 All analyses shall be performed according to the guidelines established in an appropriate Quality Assurance Plan (QAP).

### 3. Terminology

- 3.1 *Ambient conditions*- a temperature of 20°C to 30°C (68°F to 85°F), less than 50% relative humidity.
- 3.2 *Prepared biomass*- biomass that has been prepared according to this practice.
- 3.3 *Oven dry weight (ODW)*- the weight of biomass mathematically corrected for the amount of moisture present in the sample at the time of weighing

### 4. Significance and Use

- 4.1 This procedure is used, in conjunction with other procedures, to determine the chemical composition of biomass samples.
- 4.2 This procedure describes drying, size reduction, and representative sampling methods that must be performed prior to analysis for many other constituents.

## 5. Interferences

- 5.1 This procedure produces biomass samples with a particle size range. The NREL procedures for biomass compositional analysis have been optimized for samples with this particle size range. Deviation to a smaller particle size may result in a low bias in carbohydrate content (and consequent high lignin bias) due to excessive carbohydrate degradation. Deviation to a larger particle size may also result in a low bias in carbohydrate content (and consequent high lignin bias) due to incomplete hydrolysis of polymeric sugars to monomeric sugars.
- 5.2 This procedure produces samples with moisture contents below 10%. The NREL procedures for biomass compositional analysis have been optimized for samples with low moisture contents. Higher moisture content in biomass samples will alter the effective acid concentration in the concentrated acid hydrolysis steps. Lowering the acid concentration may result in a low bias in carbohydrate content due to incomplete hydrolysis of polymeric sugars to monomeric sugars. Incomplete hydrolysis leaves oligomeric sugars, which are not soluble in 4% acid and are incorrectly counted as acid insoluble residue in these procedures, introducing a consequent high lignin bias.
- 5.3 This procedure assumes that chemical fractionation does not occur during the optional sieving steps and that the chemical composition of any fines removed from the sample is substantially similar to the composition of the bulk sample. Sieving can be performed if the ash content according to LAP “Determination of Ash in Biomass” is high. Sieving may also be performed if homogeneous particle size is critical. **However, if the entire biomass sample needs to be analyzed, sieving can frequently cause fractionation and should not be performed.**

## 6. Apparatus

- 6.1 Large table or drying rack for air drying biomass (method A only).
- 6.2 Convection oven capable of maintaining  $45 \pm 5^\circ\text{C}$  (method B only).
- 6.3 Freeze-Drier - System with vacuum chamber and pump capable of maintaining a pressure of  $<1$  torr and a cold finger in the chamber capable of maintaining a temperature of  $-50^\circ\text{C}$  (method C only).
- 6.4 Balance, sensitive to 0.1 g.
- 6.5 Standard laboratory knife mill with 2 mm screen. A Wiley Mill, size No. 4 with a 2-mm screen, is suitable for samples  $>20$  g, and the intermediate model Wiley Mill, with 1-mm screen, is suitable for samples  $<20$  g that will not be sieved. Equivalent knife mills are acceptable.
- 6.6 Sieve Shaker that provides motion in both horizontal and vertical axes- for optional sieving step
  - 6.6.1 Sieve Set, No. 20 (850  $\mu\text{m}$ ), No. 80 (180  $\mu\text{m}$ ) stackable sieves with lid and bottom pan. Sieves and bottom pan should be 8.9 cm (3 1/2 in.) in height. Sieves should conform to ASTM Specification E 11.
  - 6.6.2 Riffle Sampler with Pans — A manual sample divider that splits the milled biomass into two or more equivalent sub-samples. Riffle divisions should be between 6.4 mm and 12.7 mm (1/4 to 1/2 in.) with at least twenty-four riffle openings. The feed chute and riffles should have a slope of at least  $60^\circ$ . Collection pans, one to pour the sample into the riffler, and two or more to collect the sub-samples.

## 7. Reagents and materials

### 7.1 Reagents

#### 7.1.1 For lyophilization method only

7.1.1.1 Acetone, electronic grade.

7.1.1.2 Dry ice, ground.

### 7.2 Materials

7.2.1 Assorted trays and containers as appropriate for the selected drying method.

## 8. ES&H Considerations and Hazards

- 8.1 Milling and sieving actions both produce large amounts of dust. This dust can be a nuisance, hazard, or irritant. Use appropriate respiratory protection and eye protection as needed.
- 8.2 If excessive amounts of dust are allowed to become airborne, a potential explosion hazard is possible. Provide appropriate dust control measures as needed.
- 8.3 Follow all applicable NREL chemical handling procedures.
- 8.4 This standard does not purport to address all of the safety concerns, if any, associated with its use. It is the responsibility of the user of this standard to establish appropriate safety and health practices and determine the applicability of regulatory limitations prior to use.

## 9. Sampling, Test Specimens and Test Units

- 9.1 This procedure describes sampling, and sample preparation required prior to analysis for ash, extractives, carbohydrates, lignin, and protein.

## 10. Procedure

**Prepare the biomass sample using one of the three methods described below. Use either 10.1, 10.2, or 10.3.**

10.1 **Method A - Air-drying.** This method is suitable for the preparation of large quantities (>20 g) of field-collected samples into a form appropriate for compositional analysis.

This method is suitable for drying materials where ambient humidity allows the sample to air-dry to a moisture content below 10% as measured using LAP “Determination of Total Solids in Biomass and Total Dissolved Solids in Liquid Process Samples”.

- 10.1.1 Biomass samples must first be available as pieces with overall dimensions less than 5 by 5 by 0.6 cm (2 by 2 by 1/4 in.). Stems or twigs should not exceed 0.6 cm (1/4 in.) diameter. It is recommended that wastepaper should be shredded into pieces less than 1 cm (3/8 in.) wide. Twigs, straw and wastepaper should not exceed 20 cm (8 in.) in length to facilitate milling.
- 10.1.2 The biomass material should be spread out on a suitable surface and allowed to air-dry prior to any milling. Do not pile the material deeper than 15 cm. Turn the material at least once per day to ensure even drying and inhibit microbial growth in samples.
- 10.1.3 Following NREL LAP “Determination of Total Solids in Biomass and Total Dissolved Solids in Liquid Process Samples” measure the solids content of the

biomass sample once every 24 hours.

- 10.1.4 The material is considered dried when the moisture content is less than 10% by weight and the change in weight is less than 1% in 24 h.

**10.2 Method B - Convection oven drying.** An alternative to air-drying is to dry the biomass sample in a convection oven at temperatures no greater than 45°C. This method may be used for very wet biomass samples that are at risk for microbial growth during drying, wet pretreated biomass, samples that would not be stable during prolonged exposure to ambient conditions, or for drying materials when ambient humidity does not allow the sample to air-dry to a moisture content below 10% as measured using LAP “Determination of Total Solids in Biomass and Total Dissolved Solids in Liquid Process Samples”. This drying method is suitable for small samples of biomass (<20 g).

**Note: This method may cause some biomass samples to change, particularly pretreated biomass. This procedure should only be used when air-drying is impossible.**

- 10.2.1 Select a container suitable for oven drying the biomass sample and dry this container at  $45 \pm 3^\circ\text{C}$  for a minimum of 3 h.
- 10.2.2 Place the container in a desiccator and allow the container to cool to room temperature.
- 10.2.3 Weigh the container to the nearest 0.1 g and record this weight as  $W_t$ .
- 10.2.4 Place the biomass material into the dried container to a maximum depth of 1 cm.
- 10.2.5 Weigh the container and biomass to the nearest 0.1 g and record this weight as  $W_i$ .
- 10.2.6 Place the container and biomass in a drying oven maintaining the temperature at  $45 \pm 3^\circ\text{C}$ . Allow the material to dry for 24 to 48 h.
- 10.2.7 Remove the container and biomass from the drying oven, place in a desiccator and allow the sample to cool to room temperature.
- 10.2.8 Weigh the container and biomass to the nearest 0.1 g and record this weight as  $W_f$ .
- 10.2.9 Return the sample to the drying oven, maintaining the temperature at  $45 \pm 3^\circ$ . Keep the sample in the drying oven at  $45 \pm 3^\circ\text{C}$  for minimum of 4 h .
- 10.2.10 Remove the container and biomass from the drying oven, place in a desiccator and allow the sample to cool to room temperature
- 10.2.11 Weigh each sample to the nearest 0.1 mg and record this weight.
- 10.2.12 Return the samples to the drying oven at  $45^\circ\text{C}$  for 1 h.
- 10.2.13 Remove the container and biomass from the drying oven, place in a desiccator and allow the sample to cool to room temperature.
- 10.2.14 Weigh each sample to the nearest 0.1 mg and record this weight.
- 10.2.15 Repeat steps 10.3.12 through 10.3.14 until the change in the mass of the biomass is less than 1% in one hour.
- 10.2.16 Use calculations in section 11 to determine the total solids obtained with this method.

**10.3 Method C - Lyophilization.** An acceptable alternative to air-drying (10.1) or drying in a convection oven (10.2) is lyophilization (freeze-drying) of the sample. This method is suitable for very wet biomass that is at risk for microbial growth during drying, wet

pretreated biomass, samples that would not be stable during prolonged exposure to ambient conditions, or for drying materials when ambient humidity does not allow the sample to air-dry to a moisture content below 10% as measured using LAP

“Determination of Total Solids in Biomass and Total Dissolved Solids in Liquid Process Samples”. This test method is also suitable for materials that are heat sensitive and would degrade if subjected to the drying oven in Test Method B. This drying method is suitable for small samples of biomass (<20 g).

- 10.3.1 Weigh a suitable freeze-drier container to the nearest 0.1 g and record this weight as  $W_t$ .
- 10.3.2 Place the biomass material in the container. For solid samples, do not fill the container more than half full. For liquid or slurry materials, limit the sample to the amount of material that gives a uniform coating of around 0.5 cm on the walls of the container when the sample is frozen.
- 10.3.3 Weigh the container and biomass to the nearest 0.1 g and record this weight as  $W_i$ .
- 10.3.4 Combine the dry ice and acetone in a shallow container suitable for shell freezing.
- 10.3.5 Place the freeze dry flask containing the biomass sample in the dry ice acetone mixture. Slowly turn the container (10 r/min) to freeze the material into a uniform layer on the walls of the container.
- 10.3.6 Immediately place the container on the freeze-drier and allow the material to dry until all visible traces of ice and frost are gone from the sample. This process typically takes 12 h for small (<20 g) samples, and can extend to more than 96 h for large samples (>250 g).
- 10.3.7 Remove the container and biomass from the freeze drier.
- 10.3.8 Allow the sample to warm to room temperature.
- 10.3.9 Weigh the container and biomass to the nearest 0.1 g and record this weight as  $W_f$ .
- 10.3.10 Use calculations in section 11 to determine the total solids obtained with this method.

### **Mill the dry sample, and sieve if desired.**

#### **10.4 Milling**

- 10.4.1 Feed the air-dried biomass into the knife-mill, and mill until the entire sample passes through the 2 mm screen in the bottom of the mill, or a 1mm screen on small mills. Laboratory mills can generate enough heat to damage biomass samples. Monitor the mill closely and allow the mill to cool to room temperature between batches if necessary.
- 10.4.2 If the prepared sample is not analyzed immediately after sieving milling, the sample should be stored in an airtight container or sealable polyethylene bag and kept at -20°C until needed.

#### **10.5 Optional sieving**

Note: Sieving can be performed if the ash content according to LAP “Determination of Ash in Biomass” is high. Sieving may also be performed if homogeneous particle size is critical. **However, if the entire biomass sample needs to be analyzed, sieving can frequently cause fractionation and should not be performed.**



- 10.5.1 Stack the sieves in the following order, starting at the bottom: solid catch pan, 80-mesh sieve, 20-mesh sieve.
- 10.5.2 Place the milled biomass in the 20-mesh sieve. The sample should be no more than 7 cm deep in the 20-mesh sieve. The milled sample may be processed in batches if necessary.
- 10.5.3 Place the cover on the sieve stack and secure the stack in the sieve shaker.
- 10.5.4 Shake the sieves for  $15 \pm 1$  min.
- 10.5.5 The fraction retained on the 20-mesh sieve (+20 mesh fraction) should be reprocessed (steps 10.4.1) until no biomass remains on the 20-mesh sieve.
- 10.5.6 The fraction retained on the 80-mesh sieve (-20/+80 mesh fraction) should be retained for compositional analysis.
- 10.5.7 The material in the solid catch pan is the fines (-80mesh) fraction. Retain this material for ash analysis.
- 10.5.8 Combine all of the -20/+80 mesh batches. Weigh the combined -20/+80 mesh fraction to the nearest 0.1 g. Record the weight of the -20/+80 mesh fraction as  $W_{t_{20/80}}$ .
- 10.5.9 Combine all of -80 mesh batches. Weigh the combined fines to the nearest 0.1 g. Record the weight of fines fraction as  $W_{t_{80}}$ .
- 10.5.10 If multiple sieved samples were combined they must homogenized. Pour the -20/+80 mesh fraction into the riffle sampler.
  - 10.5.10.1 The sample must be distributed evenly onto all the riffle openings. A pan, as wide as the riffle opening, should be used. Pour the sample evenly off the entire side of the pan and not from the end or the corner. Do not transfer the biomass sample from a narrow-mouth container such as a jar.
- 10.5.11 Recombine the riffled sub-samples.
- 10.5.12 Repeat steps 10.5.10 through 10.5.11 a total of four times.
- 10.5.13 Determine the total solids content (TS) of both the -20/+80 mesh fraction and the fines fraction using LAP “Determination of Total Solids in Biomass and Total Dissolved Solids in Liquid Process Samples”. Record the total solids of the -20/+80 mesh fraction as  $TS_{20/80}$ . Record the total solids content of the fines as  $TS_{-80}$ .
- 10.5.14 Determine the ash content of each fraction using LAP “Determination of Ash in Biomass”. Record the ash content of the -20/+80 mesh fraction as  $Ash_{20/80}$ . Record the ash content of the fines as  $Ash_{-80}$ .
- 10.5.15 Using the equations in Section 11, calculate the percent of each fraction in the original, biomass sample. The fraction weight percent is used to reconstruct the composition of the original biomass sample.
- 10.5.16 If the total sample needs to be subdivided into smaller samples, use the riffler to make this separation.
- 10.5.17 If the prepared sample is not analyzed immediately after sieving and riffling, the sample should be stored in an airtight container or sealable polyethylene bag and kept at  $-20^{\circ}\text{C}$  until needed.

## 11. Calculations

- 11.1 To calculate the fraction percent of -20/+80 mesh fraction, use the following equation:

$$Fraction_{20/80} \% = \left( \frac{Wt_{20/80}}{(Wt_{20/80} + Wt_{80})} \right) \times 100$$

Where:

$Wt_{20/80}$  = weight of -20/+80 mesh fraction (g)

$Wt_{80}$  = weight of fines fraction (g)

11.2 To calculate the fraction percent of -80 mesh fraction, use the following equation:

$$Fraction_{80} \% = \left( \frac{Wt_{80}}{(Wt_{20/80} + Wt_{80})} \right) \times 100$$

Where:

$Wt_{20/80}$  = weight of -20/+80 mesh fraction (g)

$Wt_{80}$  = weight of fines fraction (g)

11.3 To calculate the percent of total solids obtained by drying at 45°C (Method B), use the following equation:

$$\%T_{45} = \left( \frac{(W_f - W_t)}{(W_i - W_t)} \right) \times 100$$

Where:

$\% T_{45}$  = percent total solids of a sample oven dried at 45°C,

$W_t$  = tare weight of freeze-drier container,

$W_i$  = initial weight of container and sample

$W_f$  = final weight of container and sample.

11.4 To calculate the percent of total solids obtained by freeze drying (Method C), use the following equation:

$$\%T_{fd} = \left( \frac{(W_f - W_t)}{(W_i - W_t)} \right) \times 100$$

Where:

$\% T_{fd}$  = percent total solids of a freeze-dried sample,

$W_t$  = tare weight of freeze-drier container,

$W_i$  = initial weight of container and sample

$W_f$  = final weight of container and sample.

11.5 For larger biomass samples that must be prepared in batches, record the total percent solids of each fraction as well as the combined weight of the biomass in each fraction, ( $W_f - W_t$ ).

11.6 To calculate the composition of constituent X in the original biomass sample, use the following equation:

$$\%X_{Original} = (\%X_{-20/+80} \times Fraction_{-20/+80} \%) + \left( \%X_{-20/+80} \times \left( \frac{100 - \%Ash_{-80} + \%Ash_{-20/+80}}{100} \right) \times Fraction_{-80} \% \right)$$

## 12. Report Format

- 12.1 Report weight percent prepared biomass and weight percent fines. Report results on an oven dry weight basis.

## 13. Precision and Bias

- 13.1 *Repeatability* – Duplicate determinations on splits of the gross sample, by the same operator, using the same sieves, should duplicate the percent mass fractions within 2% absolute.
- 13.2 *Reproducibility* – Duplicate determinations on splits of the gross sample, by different operators, using the same sieves, should duplicate the percent mass fractions within 2% absolute.
- 13.3 *Bias* – Since there is not an appropriate standard reference material, no statement about bias can be made.
- 13.4 *Round robin testing* – For a report documenting an international round robin test of biomass analysis methods, including this procedure, see Milne et al., 1992.

## 14. Quality Control (all items bellow, missing)

- 14.1 Reported Significant Figures or decimal places: Determined by data quality objectives and laboratory specific Quality Assurance Plan, see LAP “Rounding and Significant Figures”.
- 14.2 Replicates: not applicable
- 14.3 Blank: not applicable
- 14.4 Relative percent difference criteria: not applicable
- 14.5 Calibration verification standard: not applicable
- 14.6 Sample size: not applicable
- 14.7 Sample storage: If the prepared biomass sample is not analyzed immediately after sieving and riffing, the sample should be stored in an air-tight container or sealable polyethylene bag and kept at –20°C until needed.
- 14.8 Standard storage: not applicable
- 14.9 Standard preparation: not applicable
- 14.10 Definition of a batch: not applicable
- 14.11 Control charts: not applicable

## 15. Appendices

- 15.1 None

## 16. References

- 16.1 Moore, W., and D. Johnson. 1967. *Procedures for the Chemical Analysis of Wood and Wood Products*. Madison, WI: U.S. Forest Products Laboratory, U.S. Department of Agriculture
- 16.2 ASTM E 1757 - 01 "Standard Practice for Preparation of Biomass for Compositional Analysis" In *2003 Annual Book of ASTM Standards, Volume 11.05*. Philadelphia, PA: American Society for Testing and Materials, International.
- 16.3 NREL Laboratory Analytical Procedure "Determination of Total Solids in Biomass and Total Dissolved Solids in Liquid Process Samples"
- 16.4 NREL Laboratory Analytical Procedure "Determination of Ash in Biomass"
- 16.5 TAPPI Test Method T264 cm-97, "Preparation of wood for chemical analysis" In *Tappi Test Method 2002-2003*. Atlanta, GA: Technical Association of the Pulp and Paper Industry
- 16.6 National Forage Testing Association Methods, available on-line at [http://www.foragetesting.org/lab\\_procedures.php](http://www.foragetesting.org/lab_procedures.php), Omaha, Nebraska, National Forage Testing Association, Accessed April 2004
- 16.7 Milne, T. A.; Chum, H. L.; Agblevor, F. A.; Johnson, D. K. (1992). "Standardized Analytical Methods" Biomass & Bioenergy. Proceedings of International Energy Agency Bioenergy Agreement Seminar", 2-3 April 1992, Edinburgh, U.K.. Vol. 2(1-6), 1992; pp. 341-366
