# Supplementary material
Source: PubMed Central journal article supplement (PMC2923870)
Supplement: jf1008023_si_007.pdf [file jf1008023_si_007.pdf]

# Determination of Protein Content in Biomass

## Laboratory Analytical Procedure (LAP)

Issue Date: 05/23/2008

B. Hames, C. Scarlata, and A. Sluiter

*Technical Report*  
NREL/TP-510-42625  
Revised May 2008

NREL is operated by Midwest Research Institute • Battelle Contract No. DE-AC36-99-GO10337

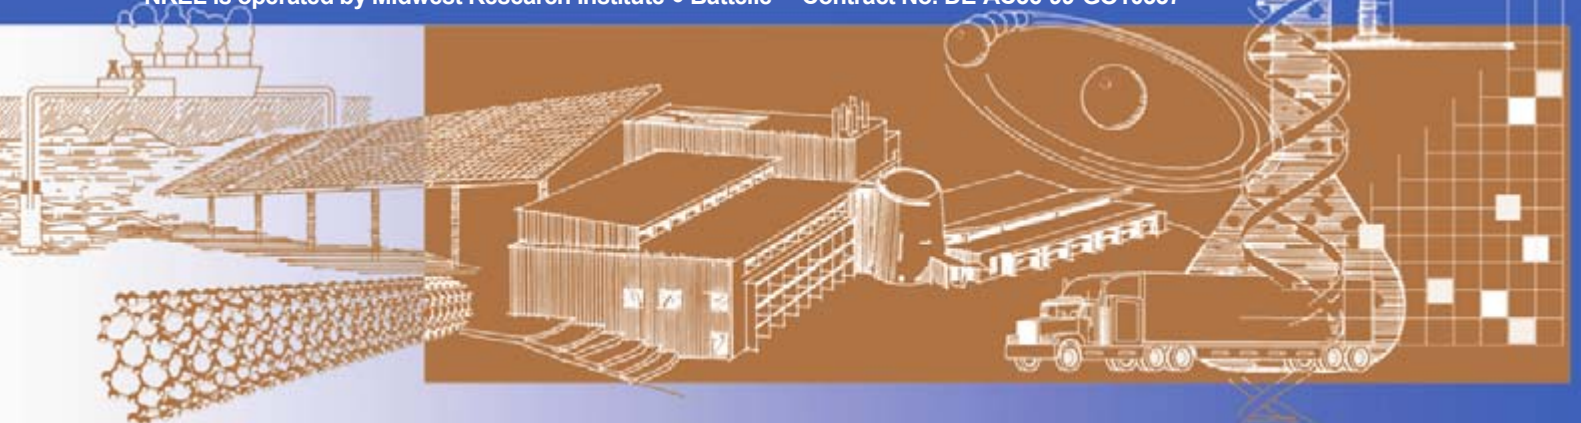

# Determination of Protein Content in Biomass

## Laboratory Analytical Procedure (LAP)

Issue Date: 05/23/2008

B. Hames, C. Scarlata, and A. Sluiter

*Technical Report*  
NREL/TP-510-42625  
Revised May 2008

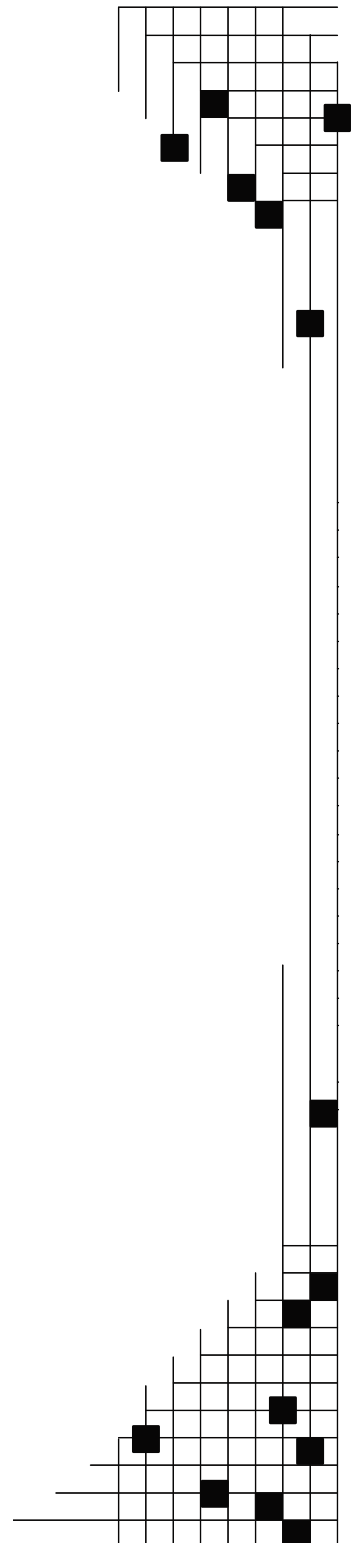

**National Renewable Energy Laboratory**  
1617 Cole Boulevard, Golden, Colorado 80401-3393  
303-275-3000 • [www.nrel.gov](http://www.nrel.gov)

Operated for the U.S. Department of Energy  
Office of Energy Efficiency and Renewable Energy  
by Midwest Research Institute • Battelle

Contract No. DE-AC36-99-GO10337

## DISCLAIMER

These Standard Biomass Analytical Methods (“Methods”) are provided by the National Renewable Energy Laboratory (“NREL”), which is operated by the Midwest Research Institute (“MRI”) for the Department Of Energy.

Access to and use of these Methods shall impose the following obligations on the user. The user is granted the right, without any fee or cost, to use, copy, modify, alter, enhance and distribute these Methods for any purpose whatsoever, except commercial sales, provided that this entire notice appears in all copies of the Methods. Further, the user agrees to credit NREL/MRI in any publications that result from the use of these Methods. The names NREL/MRI, however, may not be used in any advertising or publicity to endorse or promote any products or commercial entity unless specific written permission is obtained from NREL/MRI. The user also understands that NREL/MRI is not obligated to provide the user with any support, consulting, training or assistance of any kind with regard to the use of these Methods or to provide the user with any updates, revisions or new versions.

THESE METHODS ARE PROVIDED BY NREL/MRI "AS IS" AND ANY EXPRESS OR IMPLIED WARRANTIES, INCLUDING BUT NOT LIMITED TO, THE IMPLIED WARRANTIES OF MERCHANTABILITY AND FITNESS FOR A PARTICULAR PURPOSE ARE DISCLAIMED. IN NO EVENT SHALL NREL/MRI BE LIABLE FOR ANY SPECIAL, INDIRECT OR CONSEQUENTIAL DAMAGES OR ANY DAMAGES WHATSOEVER, INCLUDING BUT NOT LIMITED TO CLAIMS ASSOCIATED WITH THE LOSS OF DATA OR PROFITS, WHICH MAY RESULT FROM AN ACTION IN CONTRACT, NEGLIGENCE OR OTHER TORTIOUS CLAIM THAT ARISES OUT OF OR IN CONNECTION WITH THE ACCESS, USE OR PERFORMANCE OF THESE METHODS.

# Procedure Title: Determination of Protein Content in Biomass

## Laboratory Analytical Procedure

### 1. Introduction

- 1.1 Biomass used as a feedstock for conversion to fuels and chemicals may contain protein and other nitrogen containing materials. These constituents are measured as part of a comprehensive biomass analysis. Protein in biomass is difficult to measure directly. In many cases the nitrogen content of the biomass sample is measured by combustion or Kjeldahl methods and the protein content is estimated using an appropriate Nitrogen Factor (NF). There are published methods that recommend using an NF of 6.25 for all types of biomass except wheat grains where an NF of 5.70 is recommended. Use of these published nitrogen factors may lead to errors when applied to biomass feedstock or process intermediates. This LAP includes a procedure for calculating an appropriate NF for most biomass types.
- 1.2 The procedure for the determination of Nitrogen Factors is substantially similar to that described in Mossé (1990).
- 1.3 This procedure covers the determination of nitrogen-to-protein conversion factors that are used to estimate the amount of protein in a biomass sample.

### 2. Scope

- 2.1 This procedure is appropriate for most types of biomass, including extractives-free biomass (biomass that has been extracted using LAP “Determination of Extractives in Biomass”) and biomass before extraction.
- 2.2 This procedure is suitable for biomass feedstocks, process solids, and process liquids.
- 2.3 Some types of biomass feedstocks, such as bark-free wood chips, contain little or no protein. For these samples, a protein measurement is not a necessary part of a comprehensive compositional analysis.
- 2.4 All analyses shall be performed according to the guidelines established in an appropriate laboratory specific Quality Assurance Plan (QAP).
- 2.5 Results are reported as a weight percent of the oven-dried biomass (105°C).

### 3. Terminology

- 3.1 *Oven dry weight (ODW)*- the weight of biomass mathematically corrected for the amount of moisture present in the sample at the time of weighing
- 3.2 *Nitrogen Factor* – A conversion factor used to estimate protein content from measured nitrogen content.
- 3.3 *Non-protein nitrogen* – The difference between the measured nitrogen content and the nitrogen content that can be accounted for in protein. This includes, but is not limited to, nitrogen found in nitrates, nitrites, chlorophyll, nucleic acids and free amino acids.

#### **4. Significance and Use**

- 4.1 This procedure is used, possibly in conjunction with other procedures, to determine the amount of protein and other nitrogen containing materials in a solid biomass sample.
- 4.2 This procedure is used at several stages in a comprehensive compositional analysis of a biomass sample.

#### **5. Interferences**

- 5.1 In this procedure the protein content of a biomass sample is estimated using the results of other determinations (nitrogen content and amino acid profile). The precision and accuracy of those methods are reflected in the results.
- 5.2 Biomass samples containing less than 0.2 weight percent protein may fall below the validated range of analysis for some standard methods. AOAC 990.03 for crude protein by combustion states that the method is applicable to solids samples containing 0.2% – 20% nitrogen
- 5.3 Protein in biomass may be structurally modified during pretreatment and saccharification. Standard amino acid determinations may not quantify these portions of the protein. Assumptions made in this method concerning the relationship between nitrogen content and protein content may no longer be valid.

#### **6. Apparatus**

- 6.1 This procedure requires a measurement of sample nitrogen content. This measurement can be a combustion measurement performed according to AOAC 990.03 or a Kjeldahl measurement performed according to AOAC 984.13
- 6.2 This procedure requires multiple amino acid profiles as described by Mosse. These are modified versions of amino acid profiles procedures similar to AOAC 982.30 E(a,b,c), CHP 45.3.05 (1995) or an equivalent method.

#### **7. Reagents and materials**

##### 7.1 Reagents

- 7.1.1 none

##### 7.2 Materials

- 7.2.1 This procedure requires a measurement of sample nitrogen content. This measurement can be a combustion measurement performed according to AOAC 990.03 or a Kjeldahl measurement performed according to AOAC 984.13.
- 7.2.2 This procedure requires multiple amino acid profiles as described by Mosse. These are modified versions of amino acid profiles procedures similar to AOAC 982.30 E(a,b,c), CHP 45.3.05 (1995) or an equivalent method.
- 7.2.3 Parts of this procedure requires Nitrogen Factor Calculator worksheet, “NF calculator.xls”, available at [http://www.nrel.gov/biomass/analytical\\_procedures.html](http://www.nrel.gov/biomass/analytical_procedures.html).

## 8. ES&H Considerations and Hazards

8.1 Follow all applicable NREL chemical handling procedures

## 9. Sampling, Test Specimens and Test Units

9.1 Many CHN analyzers have a sample size limit of 100 mg or less. Further size reduction may be necessary to assure that sample being analyzed is representative of the larger biomass sample.

## 10. Procedure

10.1 Calculate an appropriate Nitrogen Factor.

10.1.1 Obtain a complete amino acid profile for each sample.

10.1.1.1 Complete amino acid profile may be obtained according to AOAC 982.30 E(a,b,c), CHP 45.3.05 (1995)

10.1.1.2 A complete amino acid profile may also be obtained according to Mossé, J., "Nitrogen to Protein Conversion Factor for 10 Cereals and 6 Legumes or oilseeds – a Reappraisal of Its Definition and Determination – Variation According to Species and to Seed Protein Content", 1990, Journal of Agriculture and Food Chemistry Vol. 38(1),18-24.

10.1.2 Obtain a measurement of the total nitrogen content of each biomass sample. If necessary, convert the values to a percent dry weight basis.

10.1.3 Enter the amino acid and nitrogen weight percent values into the Nitrogen calculator spreadsheet.

10.1.4 Calculate  $k_A$ ,  $k_P$ ,  $k_1$ ,  $k_2$  and  $\text{avg}(k_1, k_2)$  according to the equations shown in section 11

10.1.5 The average of  $k_A$  and  $k_P$  is a customized NF for this sample.  $k_1$ ,  $k_2$  are the plausible upper and lower limits (or the plus/minus error) for the customized NF as in 11.4.

## 11. Calculations

11.1 The N-factor limits in the NF calculator are calculated from amino acid and nitrogen data.

11.2 The upper limit is defined as:

$$k_A = \sum E_i / \sum D_i$$

Where:

$E_i$  = the grams of the  $i$ th Amino Acid per 100 grams of sample (dry weight basis)

$D_i$  = the grams nitrogen of the  $i$ th Amino Acid per 100 grams of sample (dry weight basis)

11.3 The lower limit is defined as:

$$k_p = \sum E_i / N$$

Where:

$E_i$  = the grams of the  $i$ th Amino Acid per 100 grams of sample (dry weight basis)  
 $N$  = the grams nitrogen per 100 grams of dry sample

11.4 A range of highest probability ( $k_1, k_2$ ) is calculated as follows:

$$k_1 = \text{avg}(k_A, k_P) + 0.25(\text{avg}(k_A, k_P))$$

and

$$k_2 = \text{avg}(k_A, k_P) - 0.25(\text{avg}(k_A, k_P))$$

11.5 The appropriate N-Factor is  $\text{avg}(k_A, k_P)$ .

11.6 The protein content of this sample is calculated as follows:

$$\% \text{protein} = \% \text{nitrogen} \times NF$$

Where:

NF = nitrogen factor = N-Factor

## 12. Report Format

12.1 Report protein as a weight percent of the oven-dried biomass. Report average and RPD

## 13. Precision and Bias

13.1 Determined by data quality objectives and laboratory specific Quality Assurance Plan.

## 14. Quality Control

14.1 Reported Significant Figures or decimal places: Determined by data quality objectives and laboratory specific Quality Assurance Plan, see LAP "Rounding and Significant Figures".

14.1.1 Replicates: Analyses should be performed in duplicate wherever possible

14.1.2 Relative percent difference criteria: Determined by data quality objectives and laboratory specific Quality Assurance Plan

14.2 Blank: not applicable

14.3 Relative percent difference criteria: not applicable

14.4 Calibration verification standard: not applicable

14.5 Sample size: 0.5 grams

14.6 Sample storage: not applicable

14.7 Standard storage: not applicable

- 14.8 Standard preparation: not applicable
- 14.9 Definition of a batch: not applicable
- 14.10 Control charts: not applicable

## **15. Appendices**

- 15.1 Excel spreadsheet N-Factor calculator.xls

## **16. References**

- 16.1 Mossé, J., "Nitrogen to Protein Conversion Factor for 10 Cereals and 6 Legumes or oilseeds – a Reappraisal of Its Definition and Determination – Variation According to Species and to Seed Protein Content", 1990, Journal of Agriculture and Food Chemistry Vol. 38(1),18-24.
- 16.2 Jones, D. "Factors for converting percentages of nitrogen in foods and feeds into percentages of proteins." U.S. Department of Agriculture, 1931, Circular(183): 21
- 16.3 Mosse, J., J. C. Huet, et al. "The Amino-Acid Composition of Wheat-Grain as a Function of Nitrogen-Content." Journal of Cereal Science, 1985, 3(2): 115-130.
- 16.4 Tkachuk, R. "Amino acid composition of wheat flours." Cereal Chemistry, 1966, 43: 207-223.
- 16.5 Tkachuk, R."Nitrogen-to-protein conversion factors for cereals and oilseed meals." Cereal Chemistry, 1969, 46: 419-423.
